# Supplementary material for: Size-dependent shock response mechanisms in nanogranular RDX: a reactive molecular dynamics study
Source: Royal Society of Chemistry journal article supplement (doi:10.1039/d4cp01696c), 2024-01-01
Supplement: d4cp01696c1.pdf [file d4cp01696c1.pdf]

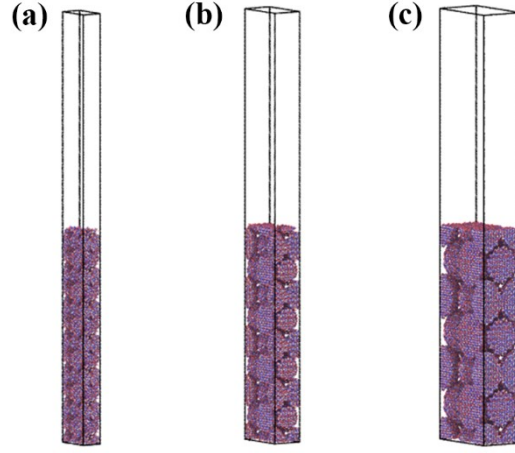

23

24 Figure S1. Configurations of (a) SR25, (b) SR35, and (c) SR50.

## 25 Hugoniot states

26 Wavefront position was clearly identified as a discontinuity in density profiles,  
 27 which is calculated as the average densities of bins with a width of 2 Å along the shock  
 28 direction. Figure S2 displays the evolution of the wavefront position of SR25, SR35,  
 29 and SR50 shocked with different velocities before rarefaction occurs. The wavefront  
 30 position of the systems composed of particles with different diameters shows little  
 31 distinction during the shock at the same particle velocity ( $U_p$ ). It indicates that particle  
 32 diameter has little effect on the shock velocity ( $U_s$ ) at the same system density, which  
 33 is consistent with the shock responses of packed Ni and Al nanoparticles<sup>1</sup>. Shock  
 34 velocity is the sum of wavefront position velocity (the slope of the linear fit in Figure  
 35 S2) and particle velocity. The shock velocity is 5.53, 6.40, 7.20, and 7.94 km/s when  
 36 the system is shocked at  $U_p$  of 2.5, 3, 3.5, and 4 km/s, respectively. The  $U_s$ - $U_p$  relation  
 37 is linear fitted as  $U_s = 1.606U_p + 1.548$  (km/s). They were compared with the theoretical  
 38 results of Selezenev et. al.<sup>2</sup> and Yadav et. al.<sup>3</sup>, as well as the experimental results of  
 39 Franken et.al.<sup>4</sup>, as shown in Figure S3. The linear fitted slop of our results is consistent

well with the theoretical results, and has some disparity compared to the experimental results. The clearly different intercept on  $y$ -axis is due to the high porosity in our systems, which agrees with the result that the lower initial density of the granularity system leads to a lower intercept on  $y$ -axis<sup>1</sup>.

The longitudinal pressure component  $P_{zz}$  of the shocked section was calculated during the initial shockwave propagating to the upper free surface. Similar  $P_{zz}$  was found for systems with different particle sizes when shocked at the same velocity.  $P_{zz}$  is approximately 14.20, 20.29, 26.59, and 31.66 GPa, respectively, which is slightly lower than the calculated value by the Rankine-Hugoniot relation  $P_s = \rho_0 U_s U_p$  (17.28, 24.00, 31.50, and 39.70 GPa, respectively). The reason is suspected that the above formula describes the ideal situation of the whole system, while  $P_{zz}$  values were calculated from atom velocities and stresses where the actual initial conditions, boundary conditions and voids between particles were considered.

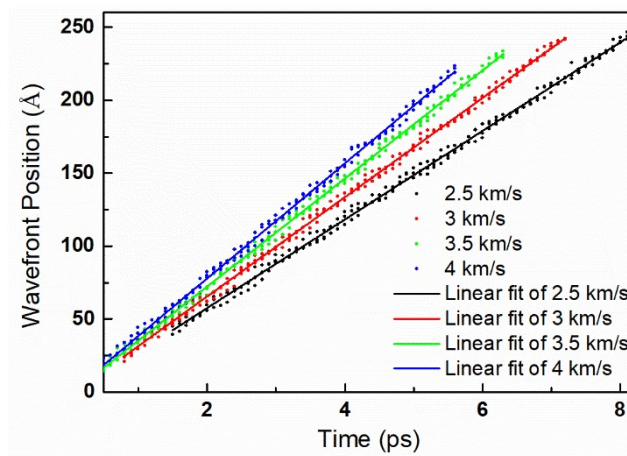

Figure S2. Evolution of wavefront position of systems shocked with different velocities before rarefaction occurs.

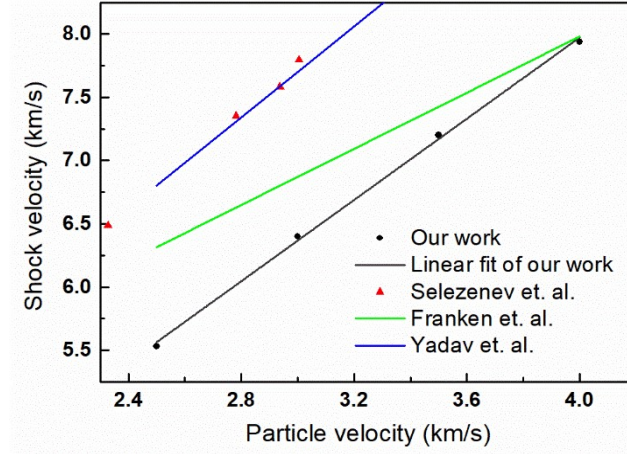

56

57 Figure S3.  $U_s$ - $U_p$  relation of systems shocked with different velocities and compared  
58 with other researchers.

59

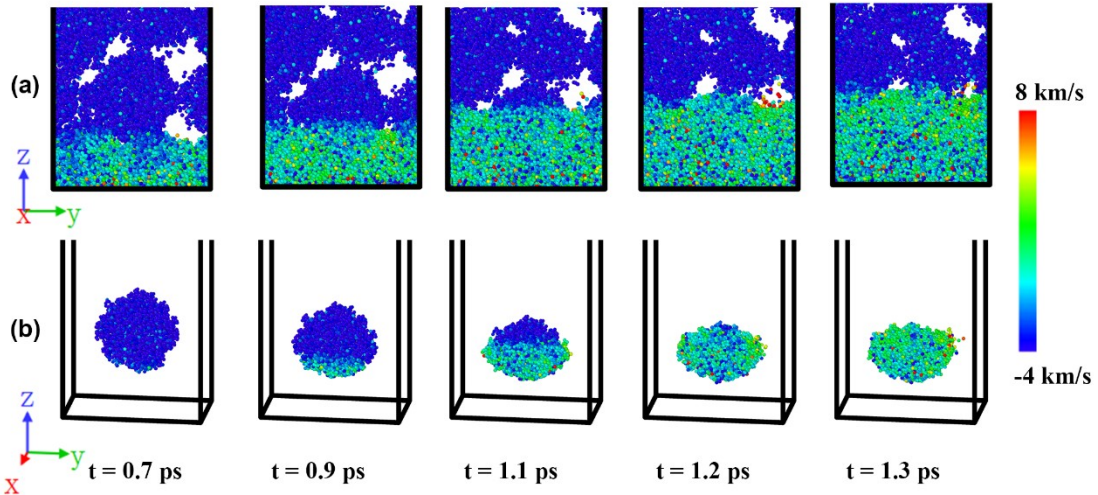

60

61 Figure S4. The snapshots of (a) 2 nm thickness slice of the model and (b) one  
62 nanoparticle during the shock wave propagate through the nanoparticle in SR25  
63 shocked with the  $U_p$  of 4 km/s. Atoms are color-coded by its velocity magnitude along  
64  $z$ -direction.

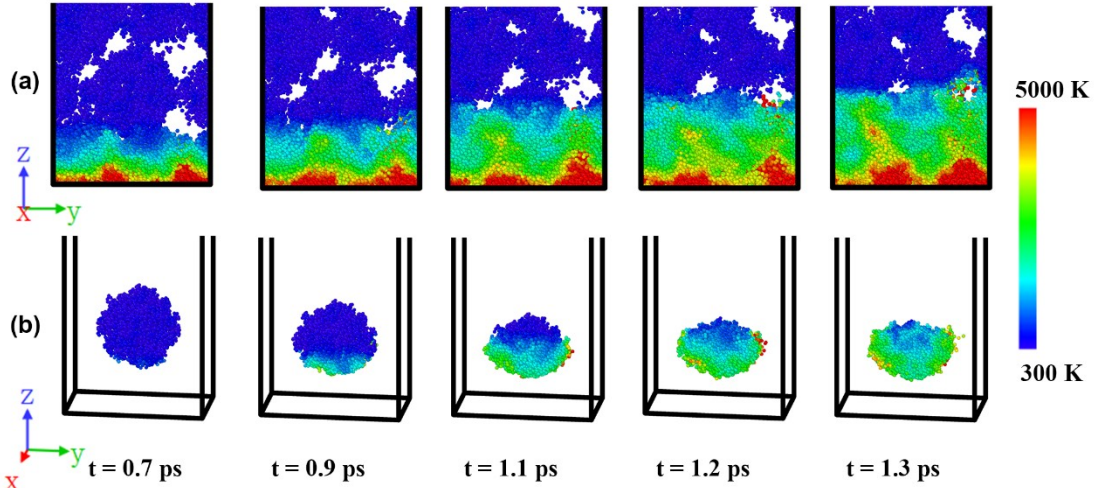

65

66 Figure S5. The snapshots of (a) 2 nm thickness slice of the model and (b) one  
 67 nanoparticle during the shock wave propagate through the nanoparticle in SR25  
 68 shocked with the  $U_p$  of 4 km/s. Atoms are color-coded by atom temperature.

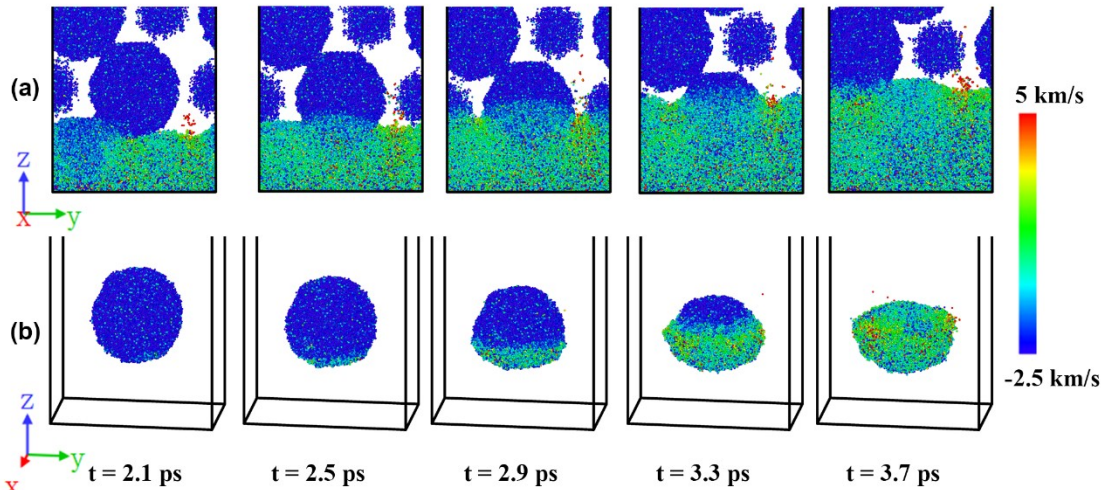

69

70 Figure S6. The snapshots of (a) 2 nm thickness slice of the model and (b) one  
 71 nanoparticle during the shock wave propagate through the nanoparticle in SR50  
 72 shocked with the  $U_p$  of 2.5 km/s. Atoms are color-coded by its velocity magnitude along  
 73  $z$ -direction.

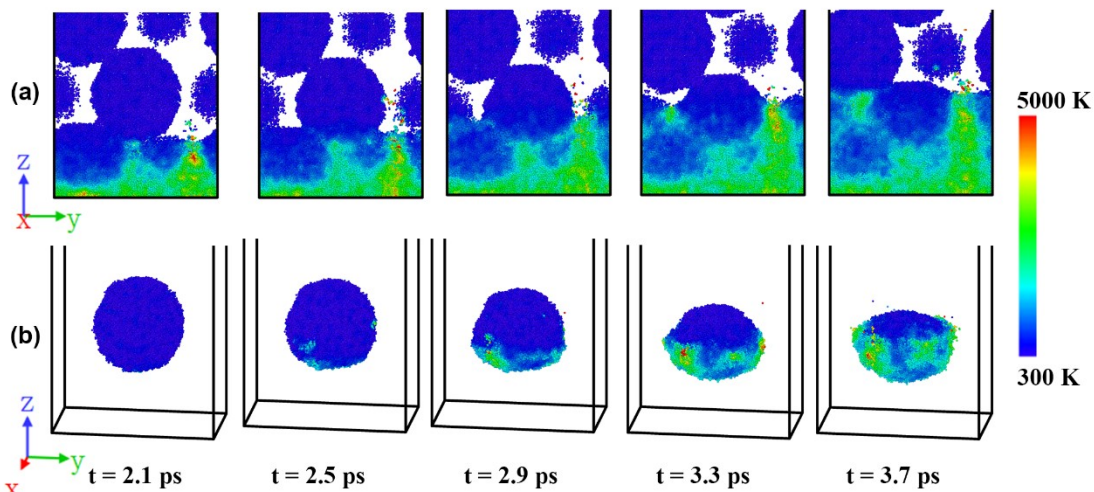

74

75 Figure S7. The snapshots of (a) 2 nm thickness slice of the model and (b) one  
 76 nanoparticle during the shock wave propagate through the nanoparticle in SR50  
 77 shocked with the  $U_p$  of 2.5 km/s. Atoms are color-coded by atom temperature.

78

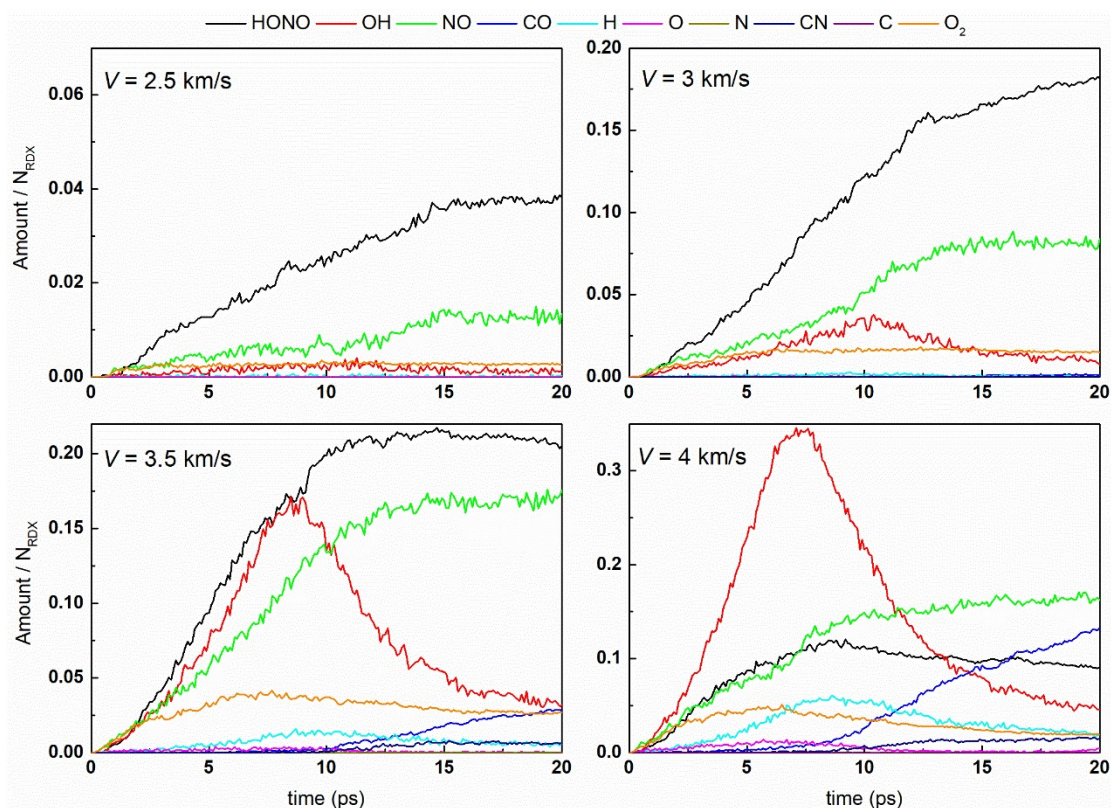

79

80 Figure S8. Evolution of key products in SR25 when shocked at different velocities.

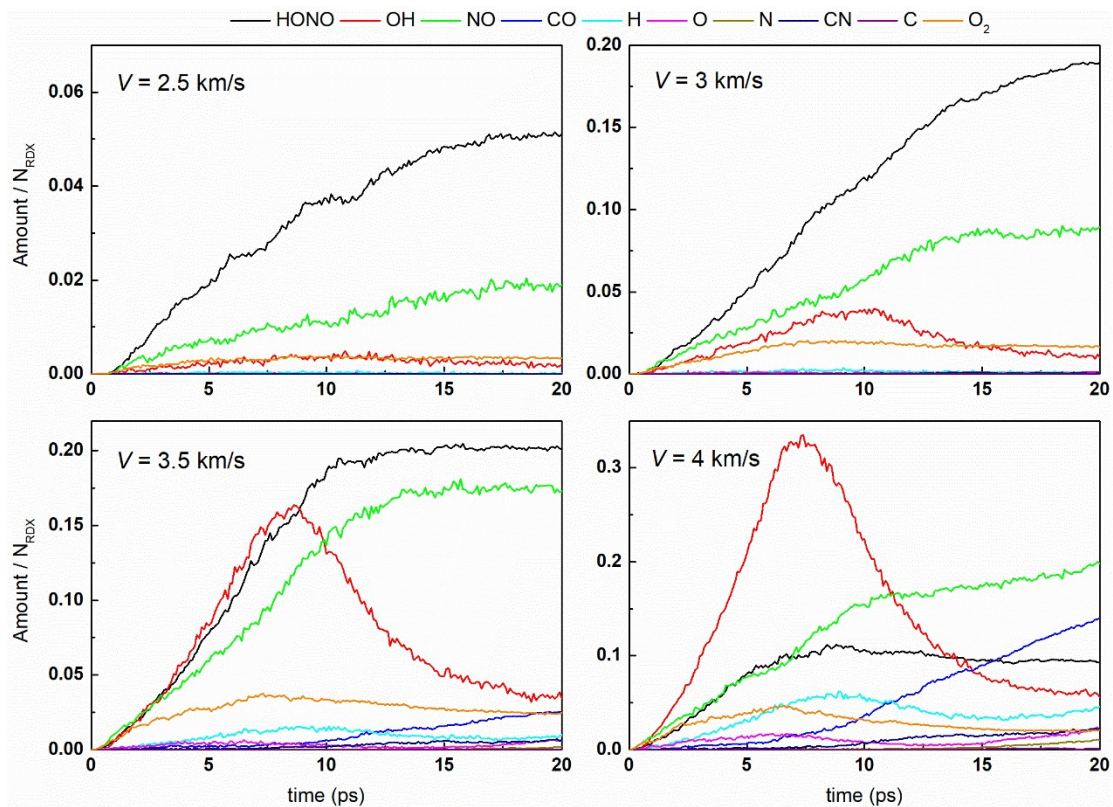

81

82 Figure S9. Evolution of key products in SR35 when shocked at different velocities.

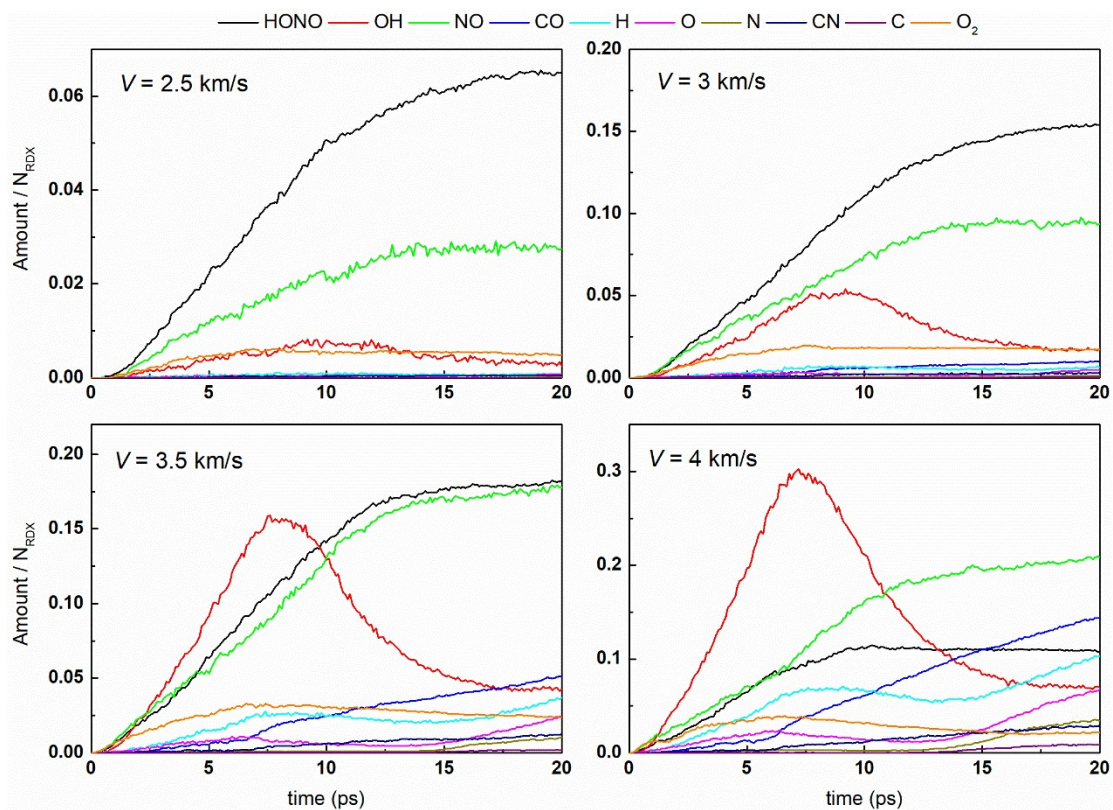

83

84 Figure S10. Evolution of key products in SR50 when shocked at different velocities.

85

86 Table S1. Key gas products (top 5) at 20 ps and their scaled amounts (divided by the  
 87 original amount of RDX in the system) located at the upper 100 Å part along the  $z$  axis  
 88 when shocked at 4 km/s.

|      | 1 <sup>st</sup>         | 2 <sup>nd</sup> | 3 <sup>rd</sup>                                                     | 4 <sup>th</sup>           | 5 <sup>th</sup>          |
|------|-------------------------|-----------------|---------------------------------------------------------------------|---------------------------|--------------------------|
| SR25 | NO <sub>2</sub> (3.74%) | NO (0.81%)      | C <sub>3</sub> H <sub>6</sub> O <sub>6</sub> N <sub>6</sub> (0.65%) | CH <sub>2</sub> N (0.63%) | H <sub>2</sub> O (0.55%) |
| SR35 | H (4.65%) <sup>c</sup>  | NO (3.11%)      | N <sub>2</sub> (2.89%)                                              | CO (2.20%)                | O (2.16%)                |
| SR50 | H (10.10%)              | O (6.51%)       | N <sub>2</sub> (4.76%)                                              | CO (4.33%)                | N (3.45%)                |

89

90 Table S2. Reaction frequencies (Top10) in 0.5 ps intervals during 0–20 ps in SR25  
 91 when shocked at different velocities.

| Particle velocity | Scale normalized freq. (%) | Primary reactions                                                                                                           |
|-------------------|----------------------------|-----------------------------------------------------------------------------------------------------------------------------|
| 2.5 km/s          | 18.3                       | $\text{C}_3\text{H}_6\text{N}_6\text{O}_6 \rightarrow \text{C}_3\text{H}_6\text{N}_5\text{O}_4 + \text{NO}_2$               |
|                   | 3.54                       | $\text{C}_3\text{H}_6\text{N}_5\text{O}_4 \rightarrow \text{C}_3\text{H}_6\text{N}_4\text{O}_2 + \text{NO}_2$               |
|                   | 3.21                       | $\text{C}_3\text{H}_6\text{N}_6\text{O}_6 + \text{NO}_2 \rightarrow \text{C}_3\text{H}_6\text{N}_6\text{O}_5 + \text{NO}_3$ |
|                   | 2.57                       | $\text{C}_3\text{H}_6\text{N}_7\text{O}_8 \rightarrow \text{C}_3\text{H}_6\text{N}_6\text{O}_5 + \text{NO}_3$               |
|                   | 2.27                       | $\text{C}_3\text{H}_6\text{N}_6\text{O}_6 + \text{NO}_2 \rightarrow \text{C}_3\text{H}_6\text{N}_7\text{O}_8$               |
|                   | 1.57                       | $\text{C}_3\text{H}_5\text{N}_5\text{O}_4 \rightarrow \text{C}_3\text{H}_5\text{N}_4\text{O}_2 + \text{NO}_2$               |
|                   | 1.34                       | $\text{C}_3\text{H}_6\text{N}_6\text{O}_6 \rightarrow \text{C}_3\text{H}_6\text{N}_4\text{O}_2 + \text{NO}_2 + \text{NO}_2$ |
|                   | 1.22                       | $\text{C}_3\text{H}_6\text{N}_6\text{O}_5 \rightarrow \text{C}_3\text{H}_6\text{N}_5\text{O}_3 + \text{NO}_2$               |
|                   | 0.90                       | $\text{NO}_2 + \text{NO}_2 \rightarrow \text{N}_2\text{O}_4$                                                                |
|                   | 0.60                       | $\text{C}_3\text{H}_6\text{N}_4\text{O}_2 + \text{NO}_2 \rightarrow \text{C}_3\text{H}_5\text{N}_4\text{O}_2 + \text{HONO}$ |
| 3 km/s            | 34.61                      | $\text{C}_3\text{H}_6\text{N}_6\text{O}_6 \rightarrow \text{C}_3\text{H}_6\text{N}_5\text{O}_4 + \text{NO}_2$               |
|                   | 7.69                       | $\text{C}_3\text{H}_6\text{N}_5\text{O}_4 \rightarrow \text{C}_3\text{H}_6\text{N}_4\text{O}_2 + \text{NO}_2$               |
|                   | 4.85                       | $\text{C}_3\text{H}_6\text{N}_6\text{O}_6 + \text{NO}_2 \rightarrow \text{C}_3\text{H}_6\text{N}_6\text{O}_5 + \text{NO}_3$ |
|                   | 4.23                       | $\text{C}_3\text{H}_6\text{N}_6\text{O}_5 \rightarrow \text{C}_3\text{H}_6\text{N}_5\text{O}_3 + \text{NO}_2$               |
|                   | 3.44                       | $\text{C}_3\text{H}_6\text{N}_6\text{O}_6 \rightarrow \text{C}_3\text{H}_6\text{N}_4\text{O}_2 + \text{NO}_2 + \text{NO}_2$ |
|                   | 2.93                       | $\text{C}_3\text{H}_5\text{N}_5\text{O}_4 \rightarrow \text{C}_3\text{H}_5\text{N}_4\text{O}_2 + \text{NO}_2$               |
|                   | 2.57                       | $\text{NO}_2 + \text{NO}_2 \rightarrow \text{N}_2\text{O}_4$                                                                |
|                   | 2.40                       | $\text{C}_3\text{H}_6\text{N}_7\text{O}_8 \rightarrow \text{C}_3\text{H}_6\text{N}_6\text{O}_5 + \text{NO}_3$               |
|                   | 1.89                       | $\text{C}_3\text{H}_6\text{N}_6\text{O}_6 + \text{NO}_2 \rightarrow \text{C}_3\text{H}_6\text{N}_7\text{O}_8$               |
|                   | 1.89                       | $\text{C}_3\text{H}_6\text{N}_4\text{O}_2 \rightarrow \text{C}_3\text{H}_6\text{N}_3 + \text{NO}_2$                         |
| 3.5 km/s          | 27.58                      | $\text{C}_3\text{H}_6\text{N}_6\text{O}_6 \rightarrow \text{C}_3\text{H}_6\text{N}_5\text{O}_4 + \text{NO}_2$               |
|                   | 4.67                       | $\text{C}_3\text{H}_6\text{N}_5\text{O}_4 \rightarrow \text{C}_3\text{H}_6\text{N}_4\text{O}_2 + \text{NO}_2$               |
|                   | 3.39                       | $\text{C}_3\text{H}_6\text{N}_6\text{O}_6 \rightarrow \text{C}_3\text{H}_6\text{N}_4\text{O}_2 + \text{NO}_2 + \text{NO}_2$ |

|        |       |                                                                                                                             |
|--------|-------|-----------------------------------------------------------------------------------------------------------------------------|
|        | 3.00  | $\text{C}_3\text{H}_6\text{N}_6\text{O}_5 \rightarrow \text{C}_3\text{H}_6\text{N}_5\text{O}_3 + \text{NO}_2$               |
|        | 2.13  | $\text{NO}_2 + \text{NO}_2 \rightarrow \text{N}_2\text{O}_4$                                                                |
|        | 1.82  | $\text{NO} + \text{NO} \rightarrow \text{N}_2\text{O}_2$                                                                    |
|        | 1.69  | $\text{C}_3\text{H}_6\text{N}_4\text{O}_2 \rightarrow \text{C}_3\text{H}_6\text{N}_3 + \text{NO}_2$                         |
|        | 1.66  | $\text{HO} + \text{HNO} \rightarrow \text{H}_2\text{O} + \text{NO}$                                                         |
|        | 1.38  | $\text{HONO} + \text{NO}_3 \rightarrow \text{HNO}_3 + \text{NO}_2$                                                          |
|        | 1.34  | $\text{C}_3\text{H}_6\text{N}_6\text{O}_6 + \text{NO}_2 \rightarrow \text{C}_3\text{H}_6\text{N}_6\text{O}_5 + \text{NO}_3$ |
| 4 km/s | 20.63 | $\text{C}_3\text{H}_6\text{N}_6\text{O}_6 \rightarrow \text{C}_3\text{H}_6\text{N}_5\text{O}_4 + \text{NO}_2$               |
|        | 2.61  | $\text{C}_3\text{H}_6\text{N}_5\text{O}_4 \rightarrow \text{C}_3\text{H}_6\text{N}_4\text{O}_2 + \text{NO}_2$               |
|        | 2.49  | $\text{C}_2\text{O}_3 \rightarrow \text{CO} + \text{CO}_2$                                                                  |
|        | 2.47  | $\text{C}_3\text{H}_6\text{N}_6\text{O}_6 \rightarrow \text{C}_3\text{H}_6\text{N}_4\text{O}_2 + \text{NO}_2 + \text{NO}_2$ |
|        | 2.05  | $\text{N}_2\text{H} + \text{HO} \rightarrow \text{H}_2\text{O} + \text{N}_2$                                                |
|        | 1.89  | $\text{H} + \text{HO} \rightarrow \text{H}_2\text{O}$                                                                       |
|        | 1.57  | $\text{CN}_2\text{O} \rightarrow \text{CO} + \text{N}_2$                                                                    |
|        | 1.52  | $\text{HO} + \text{HNO} \rightarrow \text{H}_2\text{O} + \text{NO}$                                                         |
|        | 1.52  | $\text{C}_3\text{H}_6\text{N}_6\text{O}_5 \rightarrow \text{C}_3\text{H}_6\text{N}_5\text{O}_3 + \text{NO}_2$               |
|        | 1.43  | $\text{N}_2\text{H}_2 \rightarrow \text{H}_2 + \text{N}_2$                                                                  |

92

93 Table S3. Reaction frequencies (Top10) in 0.5 ps intervals during 0–20 ps in SR35

94 when shocked at different velocities.

| Particle velocity | Scale normalized freq. (%) | Primary reactions                                                                                                           |
|-------------------|----------------------------|-----------------------------------------------------------------------------------------------------------------------------|
| 2.5 km/s          | 18.78                      | $\text{C}_3\text{H}_6\text{N}_6\text{O}_6 \rightarrow \text{C}_3\text{H}_6\text{N}_5\text{O}_4 + \text{NO}_2$               |
|                   | 3.89                       | $\text{C}_3\text{H}_6\text{N}_5\text{O}_4 \rightarrow \text{C}_3\text{H}_6\text{N}_4\text{O}_2 + \text{NO}_2$               |
|                   | 3.45                       | $\text{C}_3\text{H}_6\text{N}_6\text{O}_6 + \text{NO}_2 \rightarrow \text{C}_3\text{H}_6\text{N}_6\text{O}_5 + \text{NO}_3$ |
|                   | 2.17                       | $\text{C}_3\text{H}_6\text{N}_7\text{O}_8 \rightarrow \text{C}_3\text{H}_6\text{N}_6\text{O}_5 + \text{NO}_3$               |
|                   | 1.88                       | $\text{C}_3\text{H}_6\text{N}_6\text{O}_6 + \text{NO}_2 \rightarrow \text{C}_3\text{H}_6\text{N}_7\text{O}_8$               |
|                   | 1.77                       | $\text{C}_3\text{H}_5\text{N}_5\text{O}_4 \rightarrow \text{C}_3\text{H}_5\text{N}_4\text{O}_2 + \text{NO}_2$               |
|                   | 1.40                       | $\text{C}_3\text{H}_6\text{N}_6\text{O}_5 \rightarrow \text{C}_3\text{H}_5\text{N}_5\text{O}_3 + \text{NO}_2$               |
|                   | 1.36                       | $\text{NO}_2 + \text{NO}_2 \rightarrow \text{N}_2\text{O}_4$                                                                |
|                   | 1.35                       | $\text{C}_3\text{H}_6\text{N}_6\text{O}_6 \rightarrow \text{C}_3\text{H}_6\text{N}_4\text{O}_2 + \text{NO}_2 + \text{NO}_2$ |
|                   | 0.71                       | $\text{C}_3\text{H}_6\text{N}_4\text{O}_2 + \text{NO}_2 \rightarrow \text{C}_3\text{H}_5\text{N}_4\text{O}_2 + \text{HONO}$ |
| 3 km/s            | 33.69                      | $\text{C}_3\text{H}_6\text{N}_6\text{O}_6 \rightarrow \text{C}_3\text{H}_6\text{N}_5\text{O}_4 + \text{NO}_2$               |
|                   | 7.28                       | $\text{C}_3\text{H}_6\text{N}_5\text{O}_4 \rightarrow \text{C}_3\text{H}_6\text{N}_4\text{O}_2 + \text{NO}_2$               |
|                   | 4.61                       | $\text{C}_3\text{H}_6\text{N}_6\text{O}_5 \rightarrow \text{C}_3\text{H}_6\text{N}_5\text{O}_3 + \text{NO}_2$               |
|                   | 4.10                       | $\text{C}_3\text{H}_6\text{N}_6\text{O}_6 + \text{NO}_2 \rightarrow \text{C}_3\text{H}_6\text{N}_6\text{O}_5 + \text{NO}_3$ |
|                   | 3.26                       | $\text{C}_3\text{H}_6\text{N}_6\text{O}_6 \rightarrow \text{C}_3\text{H}_6\text{N}_4\text{O}_2 + \text{NO}_2 + \text{NO}_2$ |
|                   | 2.54                       | $\text{NO}_2 + \text{NO}_2 \rightarrow \text{N}_2\text{O}_4$                                                                |
|                   | 2.21                       | $\text{C}_3\text{H}_5\text{N}_5\text{O}_4 \rightarrow \text{C}_3\text{H}_5\text{N}_4\text{O}_2 + \text{NO}_2$               |
|                   | 2.07                       | $\text{C}_3\text{H}_6\text{N}_7\text{O}_8 \rightarrow \text{C}_3\text{H}_6\text{N}_6\text{O}_5 + \text{NO}_3$               |
|                   | 2.02                       | $\text{C}_3\text{H}_6\text{N}_5\text{O}_3 \rightarrow \text{C}_3\text{H}_6\text{N}_4\text{O} + \text{NO}_2$                 |
|                   | 1.74                       | $\text{C}_3\text{H}_6\text{N}_6\text{O}_6 + \text{NO}_2 \rightarrow \text{C}_3\text{H}_6\text{N}_7\text{O}_8$               |

|          |       |                                                                                                                             |
|----------|-------|-----------------------------------------------------------------------------------------------------------------------------|
| 3.5 km/s | 29.31 | $\text{C}_3\text{H}_6\text{N}_6\text{O}_6 \rightarrow \text{C}_3\text{H}_6\text{N}_5\text{O}_4 + \text{NO}_2$               |
|          | 5.04  | $\text{C}_3\text{H}_6\text{N}_5\text{O}_4 \rightarrow \text{C}_3\text{H}_6\text{N}_4\text{O}_2 + \text{NO}_2$               |
|          | 3.13  | $\text{C}_3\text{H}_6\text{N}_6\text{O}_5 \rightarrow \text{C}_3\text{H}_6\text{N}_5\text{O}_3 + \text{NO}_2$               |
|          | 2.88  | $\text{C}_3\text{H}_6\text{N}_6\text{O}_6 \rightarrow \text{C}_3\text{H}_6\text{N}_4\text{O}_2 + \text{NO}_2 + \text{NO}_2$ |
|          | 2.39  | $\text{NO}_2 + \text{NO}_2 \rightarrow \text{N}_2\text{O}_4$                                                                |
|          | 2.24  | $\text{NO} + \text{NO} \rightarrow \text{N}_2\text{O}_2$                                                                    |
|          | 1.93  | $\text{C}_3\text{H}_6\text{N}_6\text{O}_6 + \text{NO}_2 \rightarrow \text{C}_3\text{H}_6\text{N}_6\text{O}_5 + \text{NO}_3$ |
|          | 1.77  | $\text{C}_3\text{H}_6\text{N}_4\text{O}_2 \rightarrow \text{C}_3\text{H}_6\text{N}_3 + \text{NO}_2$                         |
|          | 1.64  | $\text{HO} + \text{HNO} \rightarrow \text{H}_2\text{O} + \text{NO}$                                                         |
|          | 1.60  | $\text{C}_3\text{H}_6\text{N}_5\text{O}_3 \rightarrow \text{C}_3\text{H}_6\text{N}_4\text{O} + \text{NO}_2$                 |
| 4 km/s   | 23.36 | $\text{C}_3\text{H}_6\text{N}_6\text{O}_6 \rightarrow \text{C}_3\text{H}_6\text{N}_5\text{O}_4 + \text{NO}_2$               |
|          | 3.07  | $\text{C}_3\text{H}_6\text{N}_5\text{O}_4 \rightarrow \text{C}_3\text{H}_6\text{N}_4\text{O}_2 + \text{NO}_2$               |
|          | 2.47  | $\text{C}_3\text{H}_6\text{N}_6\text{O}_6 \rightarrow \text{C}_3\text{H}_6\text{N}_4\text{O}_2 + \text{NO}_2 + \text{NO}_2$ |
|          | 2.46  | $\text{N}_2\text{H} + \text{HO} \rightarrow \text{H}_2\text{O} + \text{N}_2$                                                |
|          | 2.23  | $\text{C}_2\text{O}_3 \rightarrow \text{CO} + \text{CO}_2$                                                                  |
|          | 1.88  | $\text{HO} + \text{HNO} \rightarrow \text{H}_2\text{O} + \text{NO}$                                                         |
|          | 1.86  | $\text{CN}_2\text{O} \rightarrow \text{CO} + \text{N}_2$                                                                    |
|          | 1.69  | $\text{HONO} \rightarrow \text{HO} + \text{NO}$                                                                             |
|          | 1.65  | $\text{C}_3\text{H}_6\text{N}_6\text{O}_5 \rightarrow \text{C}_3\text{H}_6\text{N}_5\text{O}_3 + \text{NO}_2$               |
|          | 1.50  | $\text{CHNO} + \text{HO} \rightarrow \text{CNO} + \text{H}_2\text{O}$                                                       |

95

96 Table S4. Reaction frequencies (Top10) in 0.5 ps intervals during 0–20 ps in SR50  
97 when shocked at different velocities.

| Particle velocity | Scale normalized freq. (%) | Primary reactions                                                                                                           |
|-------------------|----------------------------|-----------------------------------------------------------------------------------------------------------------------------|
| 2.5 km/s          | 17.84                      | $\text{C}_3\text{H}_6\text{N}_6\text{O}_6 \rightarrow \text{C}_3\text{H}_6\text{N}_5\text{O}_4 + \text{NO}_2$               |
|                   | 3.91                       | $\text{C}_3\text{H}_6\text{N}_5\text{O}_4 \rightarrow \text{C}_3\text{H}_6\text{N}_4\text{O}_2 + \text{NO}_2$               |
|                   | 2.87                       | $\text{C}_3\text{H}_6\text{N}_6\text{O}_6 + \text{NO}_2 \rightarrow \text{C}_3\text{H}_6\text{N}_6\text{O}_5 + \text{NO}_3$ |
|                   | 1.55                       | $\text{C}_3\text{H}_6\text{N}_6\text{O}_6 \rightarrow \text{C}_3\text{H}_6\text{N}_4\text{O}_2 + \text{NO}_2 + \text{NO}_2$ |
|                   | 1.52                       | $\text{C}_3\text{H}_6\text{N}_7\text{O}_8 \rightarrow \text{C}_3\text{H}_6\text{N}_6\text{O}_5 + \text{NO}_3$               |
|                   | 1.43                       | $\text{NO}_2 + \text{NO}_2 \rightarrow \text{N}_2\text{O}_4$                                                                |
|                   | 1.42                       | $\text{C}_3\text{H}_6\text{N}_6\text{O}_5 \rightarrow \text{C}_3\text{H}_6\text{N}_5\text{O}_3 + \text{NO}_2$               |
|                   | 1.40                       | $\text{C}_3\text{H}_5\text{N}_5\text{O}_4 \rightarrow \text{C}_3\text{H}_5\text{N}_4\text{O}_2 + \text{NO}_2$               |
|                   | 1.30                       | $\text{C}_3\text{H}_6\text{N}_6\text{O}_6 + \text{NO}_2 \rightarrow \text{C}_3\text{H}_6\text{N}_7\text{O}_8$               |
|                   | 0.66                       | $\text{N}_2\text{O}_4 \rightarrow \text{NO} + \text{NO}_3$                                                                  |
| 3 km/s            | 30.25                      | $\text{C}_3\text{H}_6\text{N}_6\text{O}_6 \rightarrow \text{C}_3\text{H}_6\text{N}_5\text{O}_4 + \text{NO}_2$               |
|                   | 6.39                       | $\text{C}_3\text{H}_6\text{N}_5\text{O}_4 \rightarrow \text{C}_3\text{H}_6\text{N}_4\text{O}_2 + \text{NO}_2$               |
|                   | 3.86                       | $\text{C}_3\text{H}_6\text{N}_6\text{O}_5 \rightarrow \text{C}_3\text{H}_6\text{N}_5\text{O}_3 + \text{NO}_2$               |
|                   | 3.40                       | $\text{C}_3\text{H}_6\text{N}_6\text{O}_6 + \text{NO}_2 \rightarrow \text{C}_3\text{H}_6\text{N}_6\text{O}_5 + \text{NO}_3$ |
|                   | 2.80                       | $\text{C}_3\text{H}_6\text{N}_6\text{O}_6 \rightarrow \text{C}_3\text{H}_6\text{N}_4\text{O}_2 + \text{NO}_2 + \text{NO}_2$ |
|                   | 2.02                       | $\text{C}_3\text{H}_6\text{N}_7\text{O}_8 \rightarrow \text{C}_3\text{H}_6\text{N}_6\text{O}_5 + \text{NO}_3$               |
|                   | 1.89                       | $\text{C}_3\text{H}_5\text{N}_5\text{O}_4 \rightarrow \text{C}_3\text{H}_5\text{N}_4\text{O}_2 + \text{NO}_2$               |

|          |       |                                                                                                                             |
|----------|-------|-----------------------------------------------------------------------------------------------------------------------------|
|          | 1.85  | $\text{NO}_2 + \text{NO}_2 \rightarrow \text{N}_2\text{O}_4$                                                                |
|          | 1.78  | $\text{C}_3\text{H}_6\text{N}_6\text{O}_6 + \text{NO}_2 \rightarrow \text{C}_3\text{H}_6\text{N}_7\text{O}_8$               |
|          | 1.60  | $\text{C}_3\text{H}_6\text{N}_4\text{O}_2 \rightarrow \text{C}_3\text{H}_6\text{N}_3 + \text{NO}_2$                         |
| 3.5 km/s | 29.61 | $\text{C}_3\text{H}_6\text{N}_6\text{O}_6 \rightarrow \text{C}_3\text{H}_6\text{N}_5\text{O}_4 + \text{NO}_2$               |
|          | 5.40  | $\text{C}_3\text{H}_6\text{N}_5\text{O}_4 \rightarrow \text{C}_3\text{H}_6\text{N}_4\text{O}_2 + \text{NO}_2$               |
|          | 3.53  | $\text{C}_3\text{H}_6\text{N}_6\text{O}_5 \rightarrow \text{C}_3\text{H}_6\text{N}_5\text{O}_3 + \text{NO}_2$               |
|          | 2.87  | $\text{C}_3\text{H}_6\text{N}_6\text{O}_6 \rightarrow \text{C}_3\text{H}_6\text{N}_4\text{O}_2 + \text{NO}_2 + \text{NO}_2$ |
|          | 2.46  | $\text{C}_3\text{H}_6\text{N}_6\text{O}_6 + \text{NO}_2 \rightarrow \text{C}_3\text{H}_6\text{N}_6\text{O}_5 + \text{NO}_3$ |
|          | 1.88  | $\text{NO} + \text{NO} \rightarrow \text{N}_2\text{O}_2$                                                                    |
|          | 1.69  | $\text{C}_3\text{H}_6\text{N}_4\text{O}_2 \rightarrow \text{C}_3\text{H}_6\text{N}_3 + \text{NO}_2$                         |
|          | 1.47  | $\text{C}_3\text{H}_5\text{N}_4\text{O}_2 \rightarrow \text{C}_3\text{H}_5\text{N}_3 + \text{NO}_2$                         |
|          | 1.46  | $\text{C}_3\text{H}_6\text{N}_5\text{O}_3 \rightarrow \text{C}_3\text{H}_6\text{N}_4\text{O} + \text{NO}_2$                 |
|          | 1.39  | $\text{NO}_2 + \text{NO}_2 \rightarrow \text{N}_2\text{O}_4$                                                                |
| 4 km/s   | 26.01 | $\text{C}_3\text{H}_6\text{N}_6\text{O}_6 \rightarrow \text{C}_3\text{H}_6\text{N}_5\text{O}_4 + \text{NO}_2$               |
|          | 4.06  | $\text{C}_3\text{H}_6\text{N}_5\text{O}_4 \rightarrow \text{C}_3\text{H}_6\text{N}_4\text{O}_2 + \text{NO}_2$               |
|          | 2.56  | $\text{C}_3\text{H}_6\text{N}_6\text{O}_6 \rightarrow \text{C}_3\text{H}_6\text{N}_4\text{O}_2 + \text{NO}_2 + \text{NO}_2$ |
|          | 2.11  | $\text{C}_3\text{H}_6\text{N}_6\text{O}_5 \rightarrow \text{C}_3\text{H}_6\text{N}_5\text{O}_3 + \text{NO}_2$               |
|          | 2.01  | $\text{C}_2\text{O}_3 \rightarrow \text{CO} + \text{CO}_2$                                                                  |
|          | 1.97  | $\text{N}_2\text{H} + \text{HO} \rightarrow \text{H}_2\text{O} + \text{N}_2$                                                |
|          | 1.70  | $\text{HO} + \text{HNO} \rightarrow \text{H}_2\text{O} + \text{NO}$                                                         |
|          | 1.68  | $\text{C}_3\text{H}_6\text{N}_4\text{O}_2 \rightarrow \text{C}_3\text{H}_6\text{N}_3 + \text{NO}_2$                         |
|          | 1.37  | $\text{HONO} \rightarrow \text{HO} + \text{NO}$                                                                             |
|          | 1.34  | $\text{HO} \rightarrow \text{H} + \text{O}$                                                                                 |

98

99

100 **References**

- 101 1. Y. Xiong, X. Li, S. Xiao, H. Deng, B. Huang, W. Zhu and W. Hu, *Physical Chemistry Chemical*  
102 *Physics*, 2019, **21**, 7272-7280.
- 103 2. A. Selezenev, A. Y. Aleynikov, N. Ganchuk, P. Ermakov, S. Ganchuk, J. Aidun and A.  
104 Thompson, 2009.
- 105 3. H. Yadav, S. Asthana and S. Rao, *Defence Science Journal*, 2009, **59**, 436-440.
- 106 4. J. Franken, S. Hambir, D. Hare and D. D. Dlott, *Shock Waves*, 1997, **7**, 135-145.

107
